# Supplementary material for: Influence of Socio-Economic Factors and Region of Birth on the Risk of Preeclampsia in Sweden
Source: MDPI journal article supplement (doi:10.3390/ijerph19074080), 2022-03-30
Supplement: s1 [file s1]

**Supplementary Table S1.** Characteristics of women who were included and excluded, respectively, due to missing data on maternal education, numbers in n and (%).

|                                          | Included women | Excluded women |
|------------------------------------------|----------------|----------------|
| Women total = 48,681                     | n = 46618      | n = 2063       |
| Maternal age (yrs)                       |                |                |
| <25                                      | 6537 (14.0%)   | 950 (46.0%)    |
| 25-29                                    | 14521 (31.1%)  | 541 (26.2%)    |
| 30-34                                    | 16536 (35.5%)  | 363 (17.6%)    |
| 35-39                                    | 7611 (16.3%)   | 163 (7.9%)     |
| ≥40                                      | 1413 (3.0%)    | 46 (2.2%)      |
| Pre-pregnancy BMI (kg/m <sup>2</sup> )   |                |                |
| Missing                                  | 5645 (12.1%)   | 278 (13.5%)    |
| <18.5 (underweight)                      | 1087 (2.3%)    | 59 (2.9%)      |
| 18.5 - <25 (normal weight)               | 25664 (55.1%)  | 1039 (50.4%)   |
| 25- < 30 (overweight)                    | 10021 (21.5%)  | 437 (21.2%)    |
| ≥30 (obesity)                            | 4201 (9.0%)    | 250 (12.1%)    |
| Parity                                   |                |                |
| 1                                        | 21851 (46.9%)  | 844 (40.9%)    |
| 2                                        | 16034 (34.4%)  | 550 (26.7%)    |
| ≥3                                       | 8733 (18.7%)   | 669 (32.4%)    |
| Maternal region of birth                 |                |                |
| Missing                                  |                | 8 (0.1%)       |
| Sweden                                   | 33289 (71.4%)  | 121 (5.9%)     |
| Nordic countries                         | 963 (2.1%)     | 153 (7.4%)     |
| EU-27                                    | 1952 (4.2%)    | 196 (9.5%)     |
| Rest of Europe incl Russia               | 2996 (6.4%)    | 377 (18.3%)    |
| The Americas                             | 720 (1.5%)     | 31 (1.5%)      |
| Asia and Oceania                         | 5681 (12.2%)   | 973 (47.2%)    |
| Africa                                   | 1017 (2.2%)    | 204 (9.9%)     |
| Smoking during pregnancy                 |                |                |
| Missing                                  | 3327 (7.1%)    | 135 (6.5%)     |
| Non-smoker                               | 38916 (83.5%)  | 1701 (82.5%)   |
| Smoker                                   | 4375 (9.4%)    | 227 (11.0%)    |
| Household disposable income <sup>c</sup> |                |                |
| Not registered or <80,000 SEK/year       | 1909 (4.1%)    | 492 (23.8%)    |
| Lowest quintile                          | 8410 (18.0%)   | 846 (41.0%)    |
| 2 <sup>nd</sup> quintile                 | 8776 (18.8%)   | 479 (23.2%)    |
| 3 <sup>rd</sup> quintile                 | 9106 (19.5%)   | 151 (7.3%)     |
| 4 <sup>th</sup> quintile                 | 9201 (19.7%)   | 55 (2.7%)      |
| Highest quintile                         | 9216 (19.8%)   | 40 (1.9%)      |
| Maternal education <sup>d</sup>          |                |                |
| Missing                                  |                | 2058 (99.8%)   |
| Primary (9 yrs)                          | 6247 (13.4%)   | 4 (0.2%)       |
| Secondary (12 years)                     | 20169 (43.3%)  | 1 (0.0%)       |
| Post-secondary (>12 yrs)                 | 20202 (43.3%)  |                |
| Gestational diabetes                     | 1027 (2.2%)    | 68 (3.3%)      |
| Preeclampsia                             | 1345 (2.9%)    | 38 (1.8%)      |
